# Supplementary material for: Noninvasive detection of lung cancer using exhaled breath
Source: PubMed Central journal article supplement (PMC3930402; doi:10.1002/cam4.162), 2013-11-20

**Fig. S1**

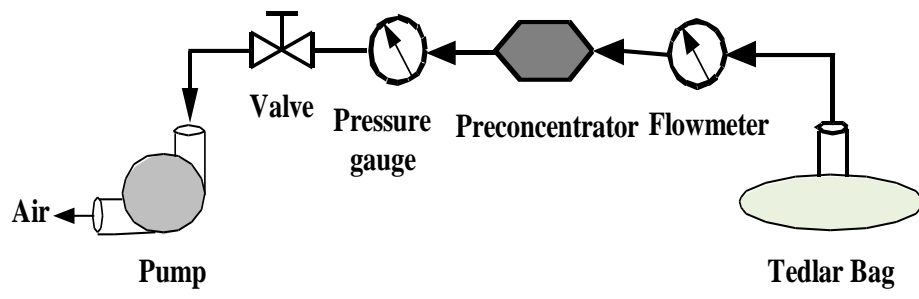

Supplement: cam40003-0174-sd1.pdf [file cam40003-0174-sd1.pdf]
